# Supplementary material
Source: PubMed Central journal article supplement (PMC2980453)
Supplement: legends.pdf [file legends.pdf]

## Data Supplements

**Supplemental Fig. S1.** Phylogenetic analysis of aquaporins. Sequence alignment in Phylip format was performed using the online program ClustalW (EBI, <http://www.ebi.ac.uk/clustalw/>) with default gap parameters. Aligned sequences were then imported into the program SplitsTree4 ([www.splitstree.org](http://www.splitstree.org)), and the BioNJ algorithm was used to construct the phylogenetic tree. GenBank accession numbers of sequences used for phylogenetic analysis are given in parentheses: human (*homo sapiens*) AQP0 (NM\_012064), human AQP1 (NP\_932766), human AQP2 (NP\_000477), human AQP3 (NP\_004916), human AQP4 (NP\_001641), human AQP5 (NP\_001642), human AQP6 (NP\_001643), human AQP7 (NP\_001161), human AQP8 (NP\_001160), human AQP9 (NP\_066190), human AQP10 (CAH70483), human AQP11 (AB028147), and human AQP12 (AB040748); zebrafish (*Danio rerio*), AQP3 (BC044188) and AQP8 (BC081511); European eel (*Anguilla anguilla*) AQP1 (AJ564420) and AQP1dup (AJ564421); Japanese eel (*Anguilla japonica*) and AQP1 (AB094501); seam bream (*Sparus aurata*) AQP3 (AY363261); Mozambique tilapia (*Oreochromis mossambicus*) AQP3 (AB126941); killifish (*Fundulus heteroclitus*) AQP0 (AF191906).

**Supplemental Fig. S2** The blot was probed with anti-European eel Aqp1. The polyclonal antibody recognized a band at molecular weight (MW) of ~27 kDa (close to the predicted WM of zebrafish Aqp1a, i.e., 27.4 kDa) in brain, eye, gill, swim bladder, and zebrafish aqp1a-injected oocytes. In addition, an additional band close to 100 kDa was recognized in brain and skeletal muscle, and a third band of ~150 kDa was recognized in skeletal muscle, which is almost invisible in a shorter exposure shown in Supplemental Fig. 2.

**Supplemental Fig. S3** The membrane was probed with anti-European eel Aqp1 antibody and anti-actin monoclonal antibody. The full blot is the same as that contributed to the blots of zebrafish Aqp1a and actin in Fig. 4 in the main text. The additional band (indicated by arrow) in gill could arise from anti-actin since it does not appear in the blot in Supplemental Fig. 2 when only Aqp1a is probed by the same antibody.
