# Supplementary material
Source: PubMed Central journal article supplement (PMC2980453)

# Supplementary Fig. S1

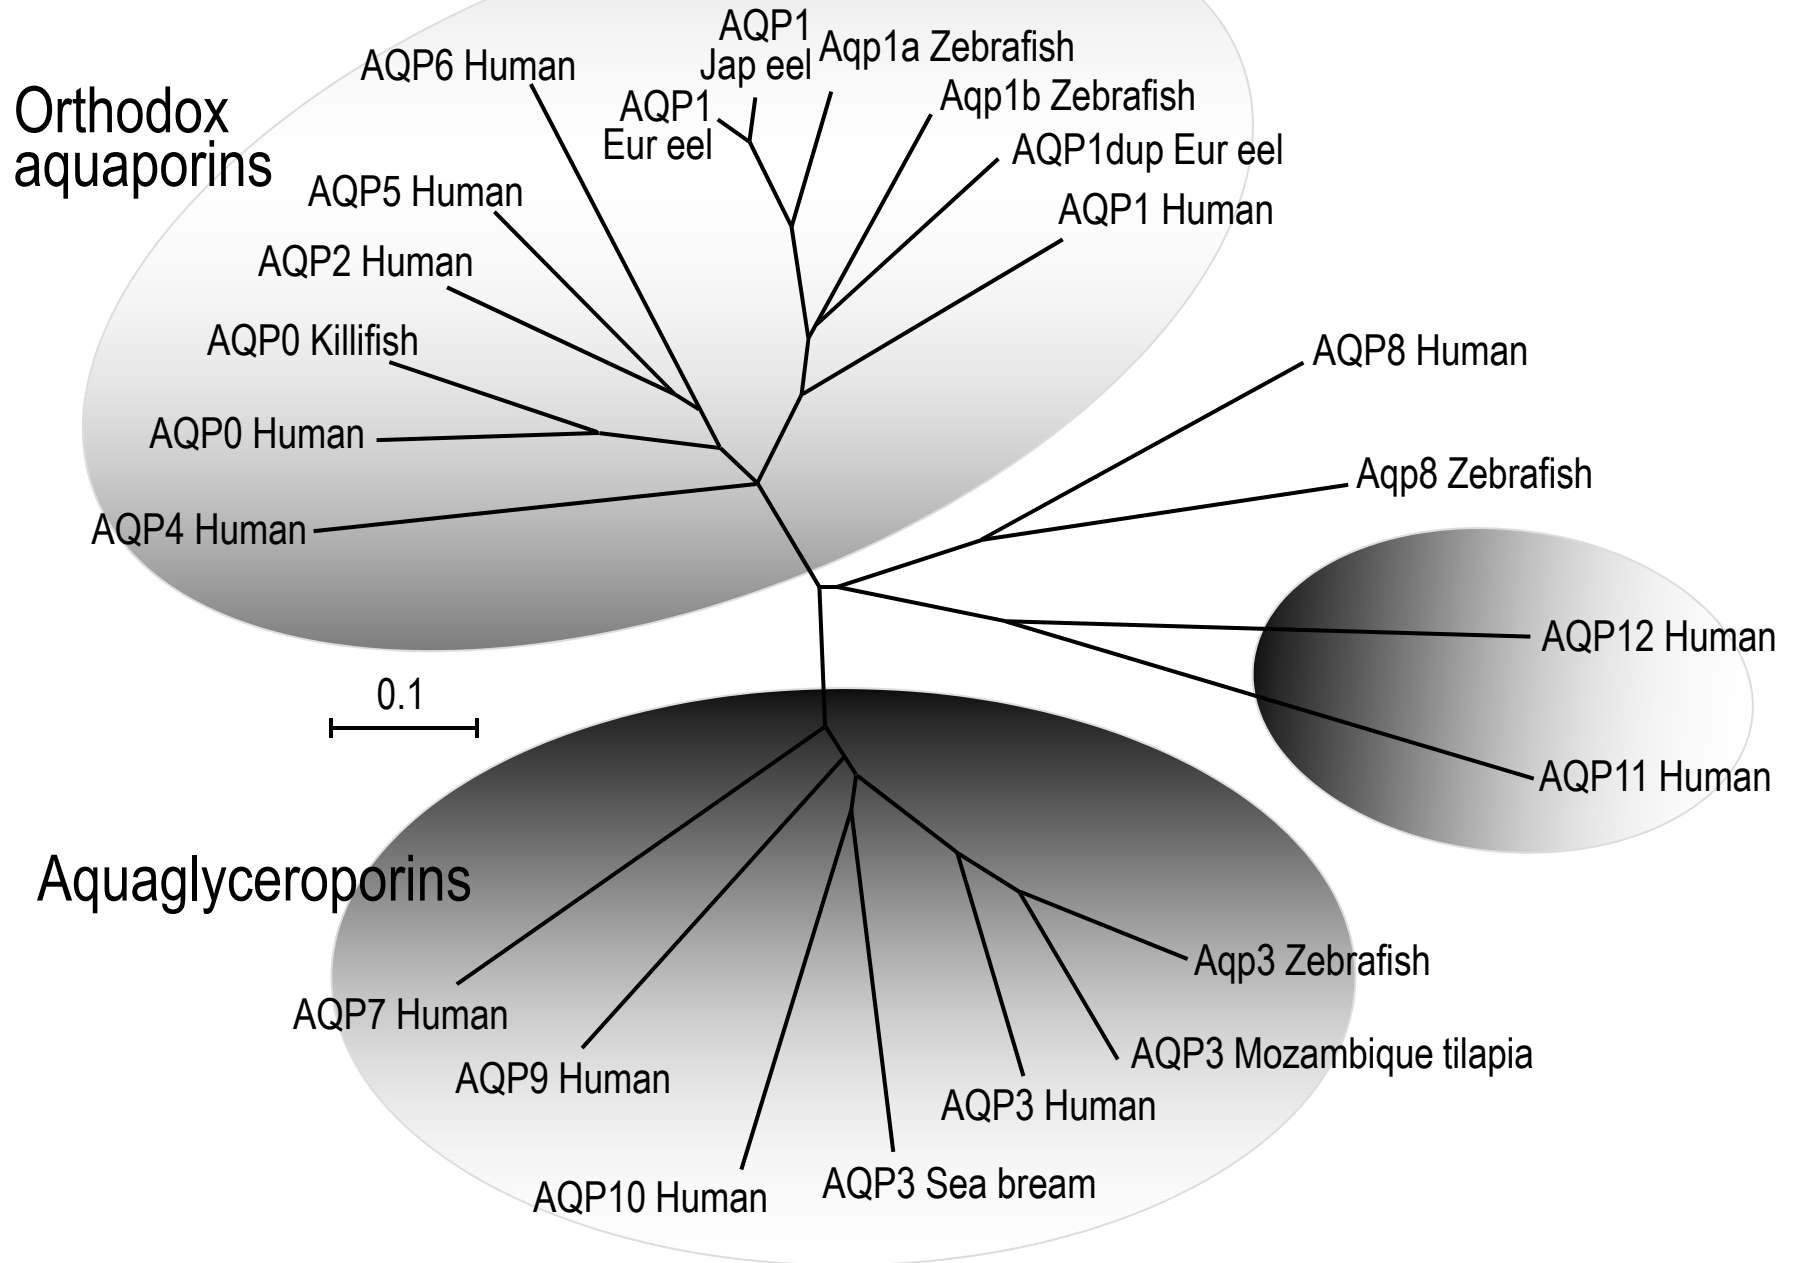

# Supplementary Fig. S2

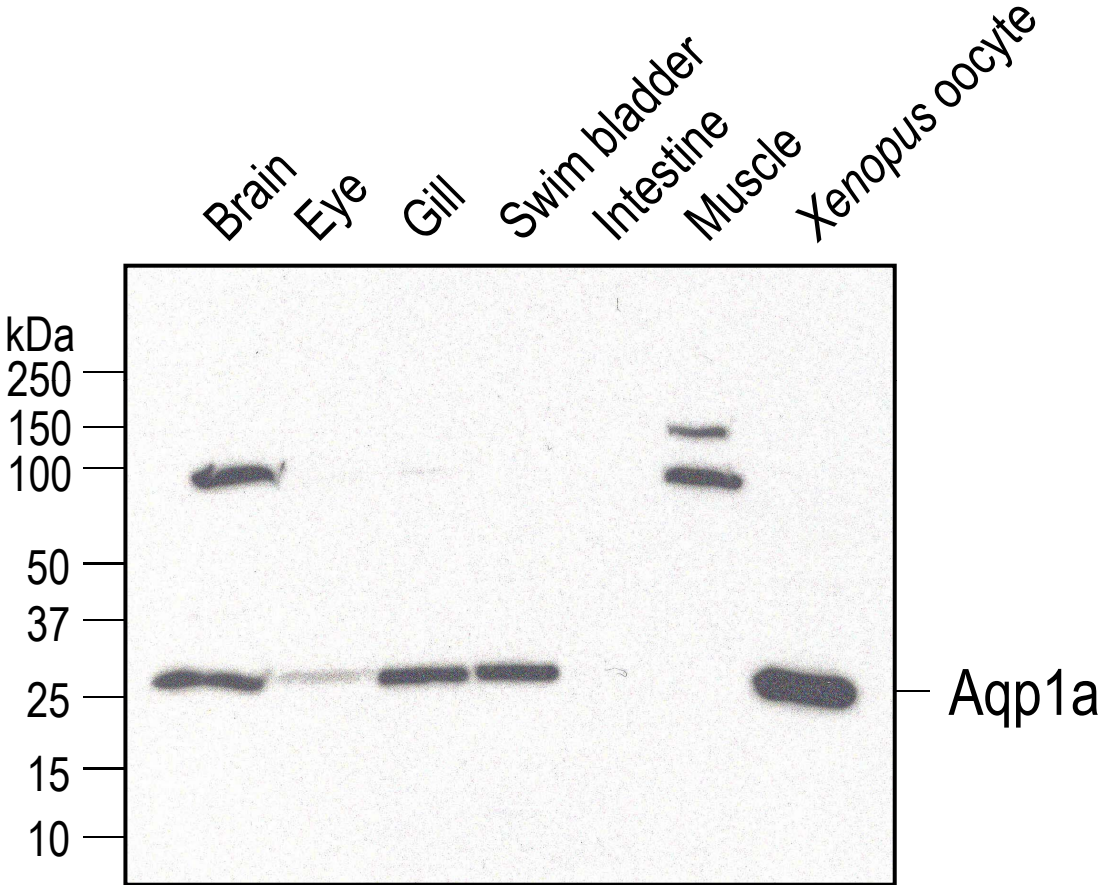

# Supplementary Fig. S3

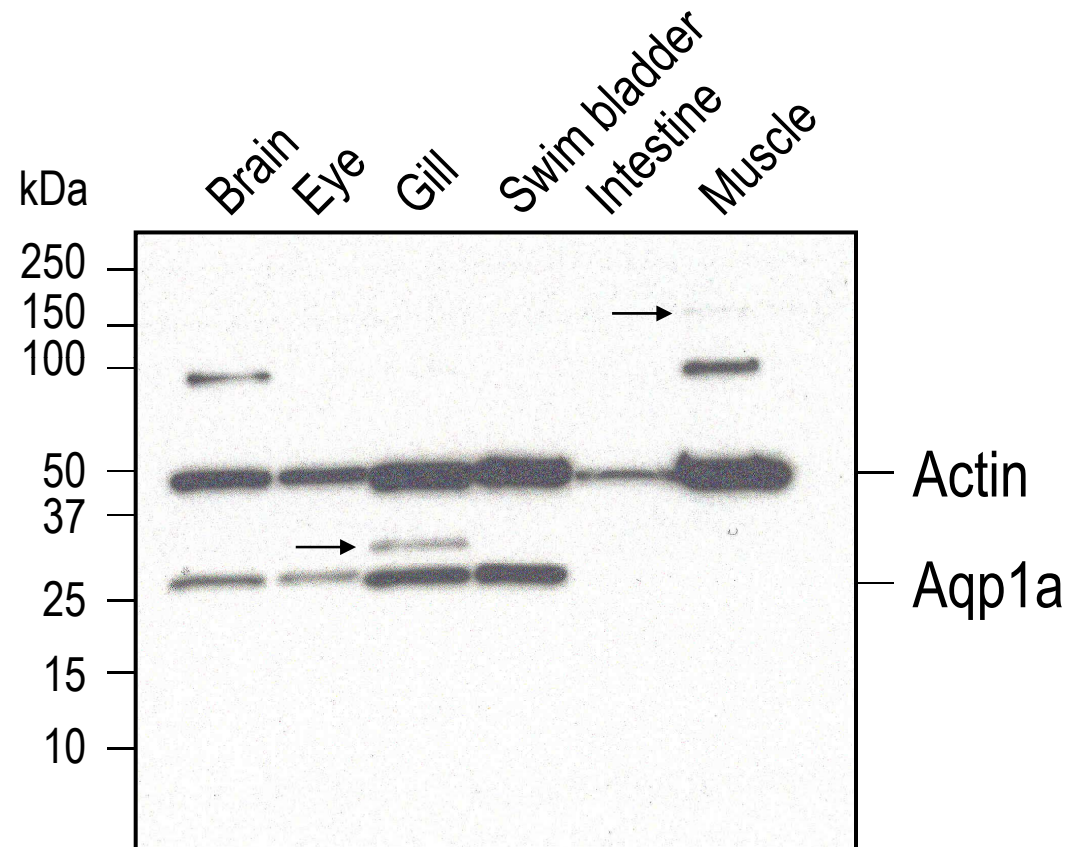

Supplement: supfigs.pdf [file supfigs.pdf]
